# Supplementary material for: Cationic nanocarriers induce cell necrosis through impairment of Na+/K+-ATPase and cause subsequent inflammatory response
Source: PubMed Central journal article supplement (PMC4650577; doi:10.1038/cr.2015.9), 2015-01-23
Supplement: cr20159x1.pdf [file cr20159x1.pdf]

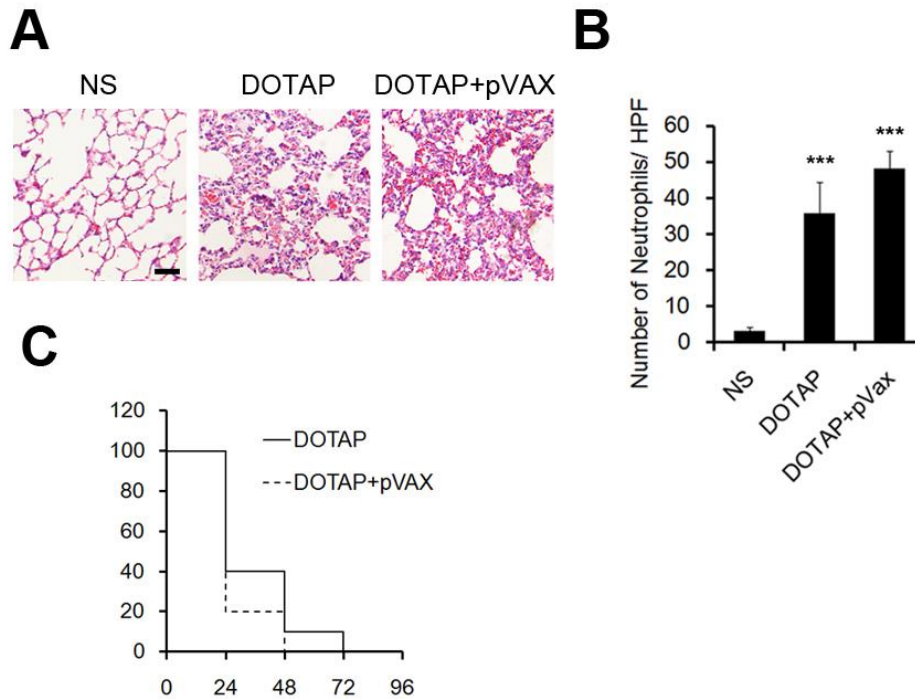

**Supplementary information, Figure S1** Pulmonary inflammation induced by cationic liposomes and lipoplexes upon systemic injection.

(A) C57BL/6 mice were injected with DOTAP liposomes (25mg/kg) and DOTAP lipoplexes with pVAX plasmid loaded (25mg/kg, DNA/liposome ratio, 1/10).  $n=3$  per group. HE staining in representative mice lung sections 24 h after injection was performed. Scale bar, 50  $\mu\text{m}$ . (B) Neutrophils in each section were stained by esterase staining and were counted in ten high power fields (HPFs). Data are mean  $\pm$ SEM;  $n=3$ . \*\*\* $P<0.001$  compared with control group by Student's  $t$ -test.

(C) Mice were injected with DOTAP liposomes (100mg/kg) or DOTAP lipoplexes (100mg/kg, DNA/liposome ratio, 1/10) through tail veins every 24 h for two days and mice survival were recorded every 24 h,  $n=10$ .
