# Supplementary material for: Cationic nanocarriers induce cell necrosis through impairment of Na+/K+-ATPase and cause subsequent inflammatory response
Source: PubMed Central journal article supplement (PMC4650577; doi:10.1038/cr.2015.9), 2015-01-23
Supplement: cr20159x2.pdf [file cr20159x2.pdf]

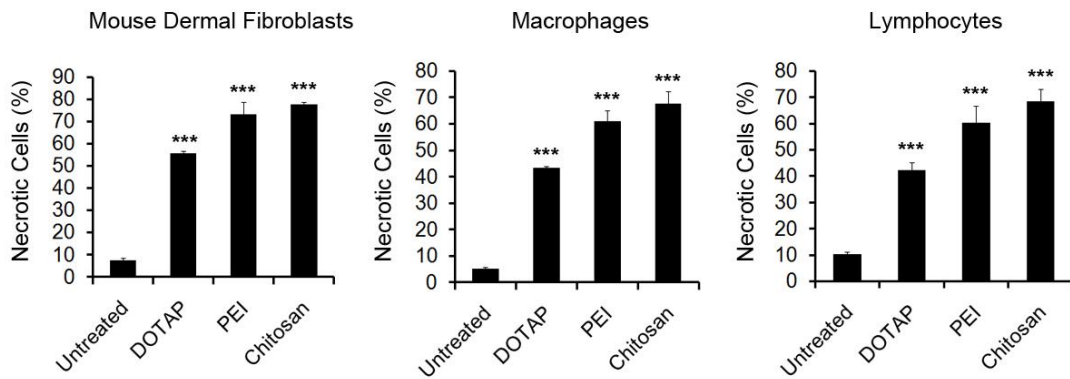

**Supplementary information, Figure S2** Acute cell necrosis induced by cationic carriers in normal cells.

Normal primary cells including mouse dermal fibroblasts, peritoneal macrophages and splenic lymphocytes were prepared and treated with DOTAP liposome (50 $\mu$ g/ml), PEI (10 $\mu$ g/ml) and Chitosan (50 $\mu$ g/ml) for 10 min. The necrotic cells were detected by flow cytometry with Annexin-V and PI staining. Data are mean  $\pm$  SEM;  $n=3$ . \*\*\* $P<0.001$  by Student's  $t$ -test.
