# Supplementary material for: Cationic nanocarriers induce cell necrosis through impairment of Na+/K+-ATPase and cause subsequent inflammatory response
Source: PubMed Central journal article supplement (PMC4650577; doi:10.1038/cr.2015.9), 2015-01-23
Supplement: cr20159x3.pdf [file cr20159x3.pdf]

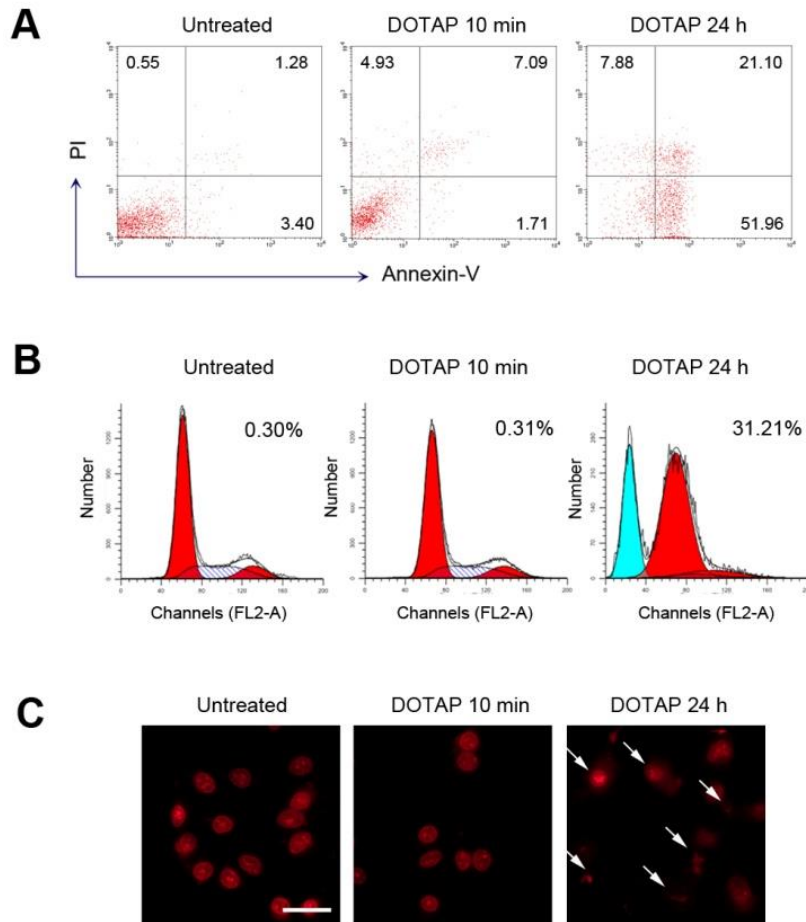

**Supplementary information, Figure S3** Apoptotic cell death appeared after 24 hours of treatment of cells with cationic carriers.

(A) Annexin-V-positive apoptotic cells were increased after 24 hours of treatment of A549 cells with DOTAP liposomes (25 $\mu$ g/ml). Numbers in each quadrant indicate the percentage of gated cells. (B) Apoptotic cells were increased after 24 hours of treatment of A549 cells with DOTAP liposomes (25 $\mu$ g/ml). The sub-G1 fraction (apoptotic cells) was detected by flow cytometry. The percentages of sub-G1 fractions are given. (C) The nuclear fragmentation was observed in cells after 24 h of treatment of A549 cells with DOTAP liposomes (25 $\mu$ g/ml) by staining with PI; Scale bar, 20  $\mu$ m.
