# Supplementary material for: Cationic nanocarriers induce cell necrosis through impairment of Na+/K+-ATPase and cause subsequent inflammatory response
Source: PubMed Central journal article supplement (PMC4650577; doi:10.1038/cr.2015.9), 2015-01-23
Supplement: cr20159x4.pdf [file cr20159x4.pdf]

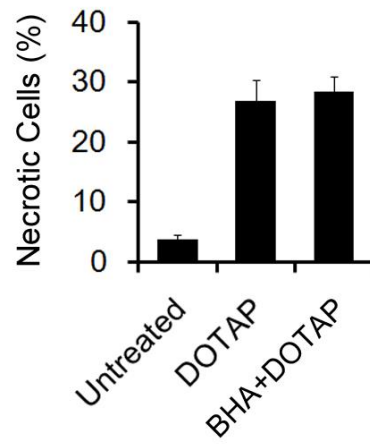

**Supplementary information, Figure S4** No reduction in cell necrosis after the pretreatment of butylated hydroxyanisole (BHA).

Cell were pretreated with BHA (100 $\mu$ M) for 30 min, and then incubated with cationic DOTAP liposomes (25 $\mu$ g/ml) for 10 min. Cell necrosis were detected by flow cytometry with PI-staining. Data are mean  $\pm$  SEM;  $n=3$ .
