# Supplementary material for: Cationic nanocarriers induce cell necrosis through impairment of Na+/K+-ATPase and cause subsequent inflammatory response
Source: PubMed Central journal article supplement (PMC4650577; doi:10.1038/cr.2015.9), 2015-01-23
Supplement: cr20159x5.pdf [file cr20159x5.pdf]

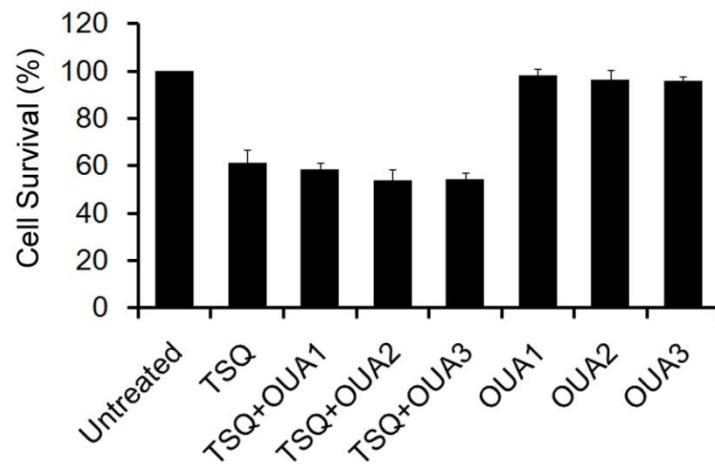

**Supplementary information, Figure S5** No inhibitory effect of ouabain in TSQ-induced cell necroptosis.

Mouse dermal fibroblasts (MDFs) were isolated and pretreated with three concentration of ouabain (OUA1:1 $\mu$ M, OUA2: 2 $\mu$ M, OUA3: 5 $\mu$ M) for 30 min, then treated with hTNF (T, 100ng/ml), Smac-mimetic (S, 500nM) and QVD-OPH (Q, 5 $\mu$ M) for 18 h. Cell viability was determined by MTT assay. Data are expressed as mean  $\pm$  SEM;  $n=3$ .
