# Supplementary material for: Cationic nanocarriers induce cell necrosis through impairment of Na+/K+-ATPase and cause subsequent inflammatory response
Source: PubMed Central journal article supplement (PMC4650577; doi:10.1038/cr.2015.9), 2015-01-23
Supplement: cr20159x6.pdf [file cr20159x6.pdf]

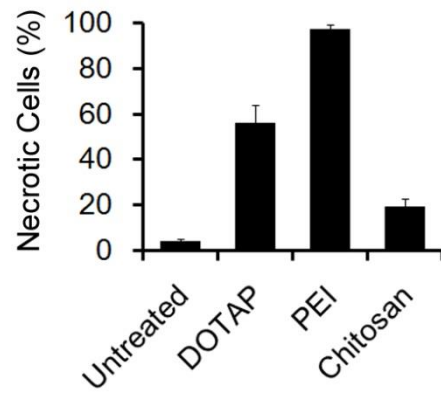

**Supplementary information, Figure S6** Cell necrosis induced by cationic nanocarriers of equal molarity.

A549 cells were incubated with equal molarity (20mM) of DOTAP liposomes; PEI and Chitosan for 10 min and cell necrosis were detected by flow cytometry. Data are mean  $\pm$  SEM;  $n=3$ .
