# Supplementary material for: Cationic nanocarriers induce cell necrosis through impairment of Na+/K+-ATPase and cause subsequent inflammatory response
Source: PubMed Central journal article supplement (PMC4650577; doi:10.1038/cr.2015.9), 2015-01-23
Supplement: cr20159x7.pdf [file cr20159x7.pdf]

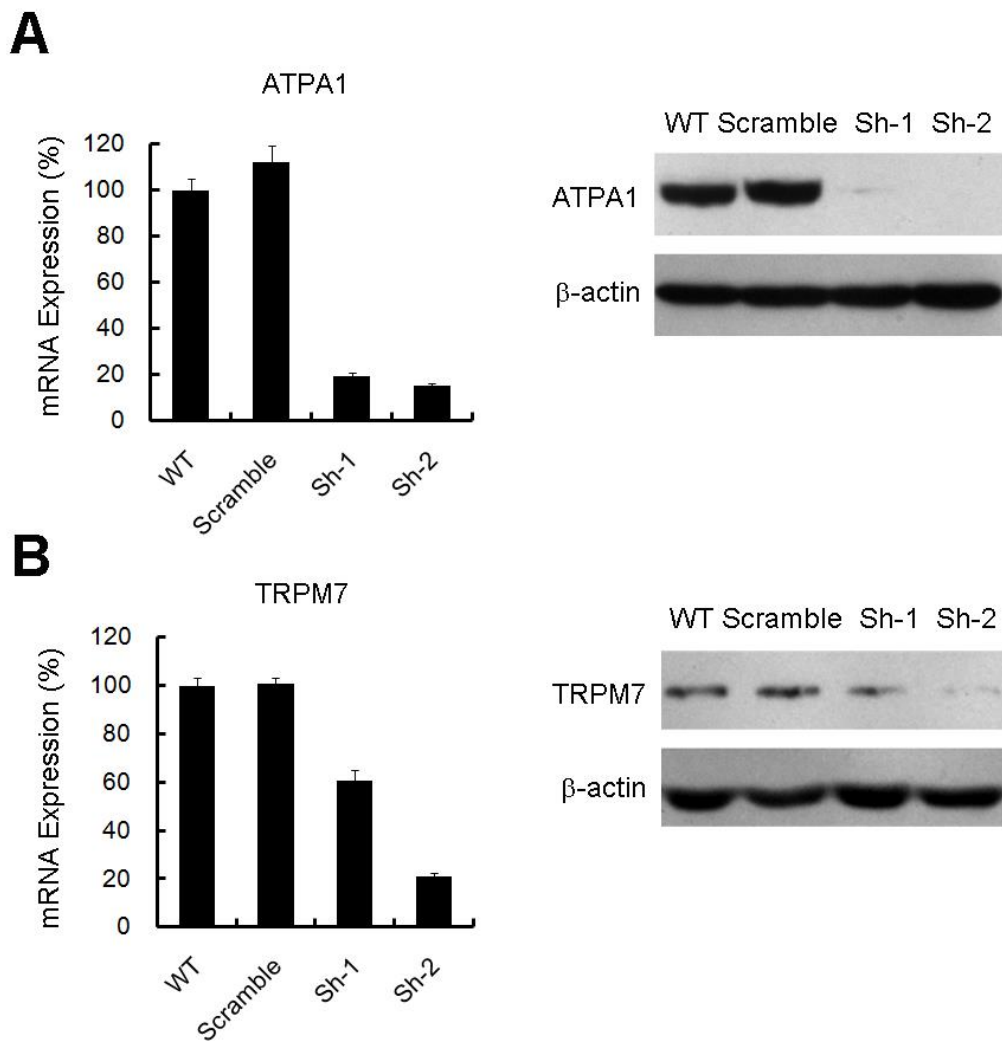

**Supplementary information, Figure S7** The knockdown of ATPA1 and TRPM7 in A549 cell line.

The knockdown of ATPA1 (**A**) and TRPM7 (**B**) in A549 cell line were confirmed by real-time PCR and western blotting. The Sh-2 group in both ATPA1- and TRPM7-knockdown cell line was further used in this experiment.
