# Supplementary material for: Cationic nanocarriers induce cell necrosis through impairment of Na+/K+-ATPase and cause subsequent inflammatory response
Source: PubMed Central journal article supplement (PMC4650577; doi:10.1038/cr.2015.9), 2015-01-23
Supplement: cr20159x8.pdf [file cr20159x8.pdf]

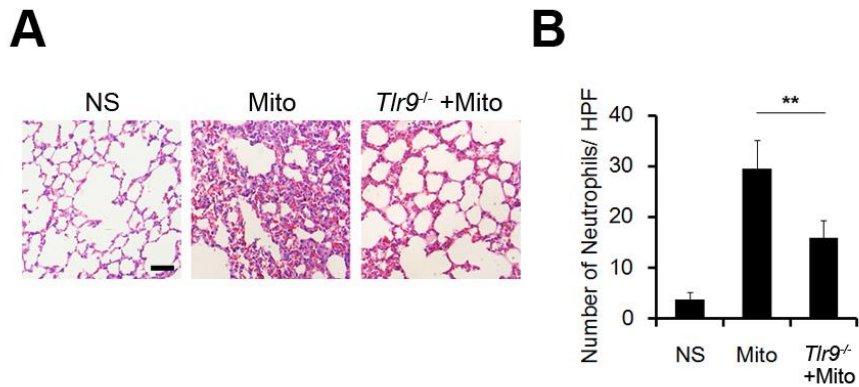

**Supplementary information, Figure S8** The reduction of pulmonary inflammation induced by mitochondria in *Tlr9*<sup>-/-</sup> mice.

(A) Normal C57BL/6 mice and *Tlr9*<sup>-/-</sup> mice were treated with mitochondria (200µg /mouse) for 24 h and HE staining of lung sections was performed. Scale bar, 50 µm. (B) Esterase-stained neutrophils were counted in ten high power fields (HPFs). Data are mean ±SEM; *n*=3. \*\**P*<0.01 compared with control group by Student's *t*-test.
